# Supplementary material for: The Global Value Chain and Welfare Effects of Tariffs—Counterfactual Analysis of Sino–US Economic and Trade Frictions
Source: MDPI journal article supplement (doi:10.3390/su14148280), 2022-07-06
Supplement: s1 [file s1]

### Section S1. Changes in real wages

It can be obtained from equation (10):

$$P_j = \prod_{s=1}^S (P_j^{sF} / \alpha_j^s)^{\alpha_j^s} \quad (S1)$$

According to the definition of changing, take the logarithm of the change in real wages and substitute (S1) into the equation,

$$\begin{aligned} \ln \frac{\hat{w}_j}{\hat{P}_j} &= \ln \hat{w}_j - \ln \hat{P}_j = \ln \hat{w}_j - \ln \prod_{s=1}^S (\hat{P}_j^{sF})^{\alpha_j^s} \\ &= \ln \hat{w}_j - \sum_{s=1}^S \alpha_j^s \ln \hat{P}_j^{sF} \\ &= \sum_{s=1}^S \alpha_j^s \ln \hat{w}_j - \sum_{s=1}^S \alpha_j^s \ln \hat{P}_j^{sF} \\ &= \sum_{s=1}^S \alpha_j^s (\ln \hat{w}_j - \ln \hat{P}_j^{sF}) \end{aligned} \quad (S2)$$

The model assumes that free domestic labor moves freely, then we get  $\hat{w}_j = \hat{w}_j^s$ . According to equation (17), we get  $\hat{w}_j^s$ ,

$$\ln \hat{c}_j^s = \ln \left( \hat{w}_j^{\gamma_j^s} \prod_{r=1}^S \hat{P}_j^{rs \gamma_j^{rs}} \right) = \gamma_j^s \ln \hat{w}_j + \gamma_j^{rs} \sum_{r=1}^S \ln \hat{P}_j^{rs} \quad (S3)$$

It can be obtained by converting:

$$\ln \hat{w}_j = \frac{1}{\gamma_j^s} \ln \hat{c}_j^s - \gamma_j^{rs} / \gamma_j^s \sum_{r=1}^S \ln \hat{P}_j^{rs} \quad (S4)$$

The expression for  $\hat{\pi}_{jj}^{sF}$  can be obtained from Equation (21):

$$\hat{\pi}_{jj}^{sF} = \left[ \frac{\hat{c}_j^s \hat{\kappa}_{jj}^{sF}}{\hat{P}_j^{sF}} \right]^{-\theta^s} \quad (S5)$$

And then it takes the log of both sides,

$$\ln \hat{\pi}_{jj}^{sF} = \ln \left[ \frac{\hat{c}_j^s \hat{\kappa}_{jj}^{sF}}{\hat{P}_j^{sF}} \right]^{-\theta^s} = -\theta^s \ln \hat{c}_j^s - \theta^s \ln \hat{\kappa}_{jj}^{sF} + \theta^s \ln \hat{P}_j^{sF} \quad (S6)$$

so we get:

$$\ln \hat{c}_j^s = -\frac{1}{\theta^s} \ln \hat{\pi}_{jj}^{sF} - \ln \hat{\kappa}_{jj}^{sF} + \ln \hat{P}_j^{sF} \quad (S7)$$

Then we put  $\ln \frac{\hat{w}_n}{\hat{P}_n}$  into it:

$$\begin{aligned}
\ln \frac{\hat{w}_n}{\hat{p}_n} &= \sum_{s=1}^S \alpha_j^s (\ln \hat{w}_j - \ln \hat{p}_j^{sF}) = \sum_{s=1}^S \alpha_j^s \left( \frac{1}{\gamma_j^s} \ln \hat{c}_j^s - \frac{\gamma_j^{rs}}{\gamma_j^s} \sum_{r=1}^S \ln \hat{p}_j^{rs} - \ln \hat{p}_j^{sF} \right) \\
&= \sum_{s=1}^S \alpha_j^s \left( \frac{1}{\gamma_j^s} \left( \frac{-1}{\theta^s} \ln \hat{\pi}_{jj}^{sF} - \ln \hat{\kappa}_{jj}^{sF} + \ln \hat{p}_j^{sF} \right) - \frac{\gamma_j^{rs}}{\gamma_j^s} \sum_{r=1}^S \ln \hat{p}_j^{rs} \right. \\
&\quad \left. - \ln \hat{p}_j^{sF} \right) \\
&= \sum_{s=1}^S \left( \frac{-\alpha_j^s}{\theta^s} \frac{1}{\gamma_j^s} \ln \hat{\pi}_{jj}^{sF} + \frac{\alpha_j^s (1 - \gamma_j^s)}{\gamma_j^s} \ln \hat{p}_j^{sF} - \alpha_j^s \frac{\gamma_j^{rs}}{\gamma_j^s} \sum_{r=1}^S \ln \hat{p}_j^{rs} \right) \\
&= - \sum_{s=1}^S \frac{\alpha_j^s}{\theta^s} \frac{1}{\gamma_j^s} \ln \hat{\pi}_{jj}^{sF} + \sum_{s=1}^S \alpha_j^s \frac{\gamma_j^{rs}}{\gamma_j^s} (\ln \hat{p}_j^{sF} - \sum_{r=1}^S \ln \hat{p}_j^{rs}) \\
&= - \sum_{s=1}^S \left( \frac{\alpha_j^s}{\theta^s} \frac{1}{\gamma_j^s} \ln \hat{\pi}_{jj}^{sF} + \frac{\alpha_j^s}{\theta^s} \ln \hat{\pi}_{jj}^{sF} - \frac{\alpha_j^s}{\theta^s} \ln \hat{\pi}_{jj}^{sF} \right) \\
&\quad - \sum_{s=1}^S \alpha_j^s \frac{\gamma_j^{rs}}{\gamma_j^s} \ln \sum_{r=1}^S \frac{\hat{p}_j^{rs}}{\hat{p}_j^{sF}} \\
&= - \sum_{s=1}^S \frac{\alpha_j^s}{\theta^s} \ln \hat{\pi}_{jj}^{sF} \\
&\quad - \sum_{s=1}^S \frac{\alpha_j^s}{\theta^s} \frac{1 - \gamma_j^s}{\gamma_j^s} \ln \hat{\pi}_{jj}^{sF} - \sum_{s=1}^S \alpha_j^s \frac{\gamma_j^{rs}}{\gamma_j^s} \ln \sum_{r=1}^S \frac{\hat{p}_j^{rs}}{\hat{p}_j^{sF}}
\end{aligned} \tag{S8}$$

Proof finished.

## Section S2. The derivation of welfare

According to equation (15), we obtain country  $j$ 's income:

$$I_j = w_j L_j + R_j + D_j \tag{S9}$$

Log-linearize the welfare

$$\ln W_j = \ln I_j - \ln P_j \tag{S10}$$

We differentiate it to get:

$$\begin{aligned}
d \ln W_j &= d \ln I_j - d \ln P_j = \frac{d I_j}{I_j} - d \ln P_j = \frac{d(w_j L_j + R_j + D_j)}{I_j} - d \ln P_j \\
&= \frac{d(w_j L_j)}{I_j} + \frac{d R_j}{I_j} + \frac{d D_j}{I_j} - d \ln P_j \\
&= \frac{w_j d L_j + L_j d w_j}{I_j} + \frac{d R_j}{I_j} + \frac{d D_j}{I_j} - d \ln P_j = \frac{L_j d w_j}{I_j} + \frac{d R_j}{I_j} - d \ln P_j \\
&= \frac{w_j L_j}{I_j} d \ln w_j + \frac{R_j}{I_j} d \ln R_j - d \ln P_j
\end{aligned} \tag{S11}$$

From equation  $\frac{R_j}{I_j} d \ln R_j = \frac{d R_j}{I_j}$  above,  $R_j = \sum_{s=1}^S \sum_{i=1}^J \tau_{ij}^{sF} M_{ij}^{sF} + \sum_{s=1}^S \sum_{i=1}^J \sum_{r=1}^S \tau_{ij}^{sr} M_{ij}^{sr}$ , We further represent the import and export share of country  $j$  to sector  $s$ , where  $M_{ij}^{sF}$  represents final imports from sector  $s$  of country  $i$  and  $M_{ij}^{sF} = \alpha_j^s I_j \frac{\pi_{ij}^{sF}}{1 + \tau_{ij}^{sF}}$ .  $M_{ij}^{sr}$  represents the import of intermediate products from country  $i$ , sector  $s$  for the production of sector  $r$  in country  $j$  and  $M_{ij}^{sr} = \sum_{r=1}^S M_{ij}^{sr} = \sum_{r=1}^S \gamma_j^{sr} Y_j^r \frac{\pi_{ij}^{sr}}{1 + \tau_{ij}^{sr}}$ . With export of final goods  $E_{ji}^{sF} = \alpha_i^s I_i \frac{\pi_{ji}^{sF}}{1 + \tau_{ji}^{sF}}$  from country  $j$ , sectors, export of intermediate  $E_{ji}^s = \sum_{r=1}^S E_{ji}^{sr} = \sum_{r=1}^S \frac{\pi_{ji}^{sr}}{1 + \tau_{ji}^{sr}} \gamma_i^{sr} Y_i^r$  from country  $j$ , sector  $s$ , we obtain

$$\begin{aligned}
dR_j &= d \left( \sum_{s=1}^S \sum_{i=1}^J \tau_{ij}^{sF} M_{ij}^{sF} + \sum_{s=1}^S \sum_{i=1}^J \sum_{r=1}^S \tau_{ij}^{sr} M_{ij}^{sr} \right) \\
&= \sum_{s=1}^S \sum_{i=1}^J d(\tau_{ij}^{sF} M_{ij}^{sF}) + \sum_{s=1}^S \sum_{i=1}^J \sum_{r=1}^S d(\tau_{ij}^{sr} M_{ij}^{sr}) \\
&= \sum_{s=1}^S \sum_{i=1}^J \tau_{ij}^{sF} dM_{ij}^{sF} + \sum_{s=1}^S \sum_{i=1}^J M_{ij}^{sF} d\tau_{ij}^{sF} + \sum_{s=1}^S \sum_{i=1}^J \sum_{r=1}^S \tau_{ij}^{sr} dM_{ij}^{sr} \\
&\quad + \sum_{s=1}^S \sum_{i=1}^J \sum_{r=1}^S M_{ij}^{sr} d\tau_{ij}^{sr} \\
&= \sum_{s=1}^S \sum_{i=1}^J \tau_{ij}^{sF} M_{ij}^{sF} d\ln M_{ij}^{sF} + \sum_{s=1}^S \sum_{i=1}^J M_{ij}^{sF} d\tau_{ij}^{sF} \\
&\quad + \sum_{s=1}^S \sum_{i=1}^J \sum_{r=1}^S \tau_{ij}^{sr} M_{ij}^{sr} d\ln M_{ij}^{sr} + \sum_{s=1}^S \sum_{i=1}^J \sum_{r=1}^S M_{ij}^{sr} d\tau_{ij}^{sr} \\
&= \sum_{s=1}^S \sum_{i=1}^J \tau_{ij}^{sF} M_{ij}^{sF} d\ln M_{ij}^{sF} + \sum_{s=1}^S \sum_{i=1}^J \alpha_j^s I_j \frac{\pi_{ij}^{sF}}{1 + \tau_{ij}^{sF}} d\tau_{ij}^{sF} \\
&\quad + \sum_{s=1}^S \sum_{i=1}^J \sum_{r=1}^S \tau_{ij}^{sr} M_{ij}^{sr} d\ln M_{ij}^{sr} + \sum_{s=1}^S \sum_{i=1}^J \sum_{r=1}^S M_{ij}^{sr} \frac{1 + \tau_{ij}^{sr}}{1 + \tau_{ij}^{sF}} d\tau_{ij}^{sr} \\
&= \sum_{s=1}^S \sum_{i=1}^J \tau_{ij}^{sF} M_{ij}^{sF} d\ln M_{ij}^{sF} + \sum_{s=1}^S \sum_{i=1}^J \alpha_j^s I_j \frac{\pi_{ij}^{sF}}{1 + \tau_{ij}^{sF}} d(1 + \tau_{ij}^{sF}) \\
&\quad + \sum_{s=1}^S \sum_{i=1}^J \sum_{r=1}^S \tau_{ij}^{sr} M_{ij}^{sr} d\ln M_{ij}^{sr} + \sum_{s=1}^S \sum_{i=1}^J \sum_{r=1}^S M_{ij}^{sr} \frac{1 + \tau_{ij}^{sr}}{1 + \tau_{ij}^{sF}} d(1 + \tau_{ij}^{sr}) \\
&= \sum_{s=1}^S \sum_{i=1}^J \tau_{ij}^{sF} M_{ij}^{sF} d\ln M_{ij}^{sF} + \sum_{s=1}^S \alpha_j^s I_j \sum_{i=1}^J \pi_{ij}^{sF} d\ln \tau_{ij}^{sF} \\
&\quad + \sum_{s=1}^S \sum_{i=1}^J \sum_{r=1}^S \tau_{ij}^{sr} M_{ij}^{sr} d\ln M_{ij}^{sr} + \sum_{s=1}^S \sum_{r=1}^S \sum_{i=1}^J M_{ij}^{sr} (1 + \tau_{ij}^{sr}) d\ln i
\end{aligned} \tag{S12}$$

With  $P_j = \prod_{s=1}^S (P_j^{sF} / \alpha_j^s)^{\alpha_j^s}$  and  $d\ln P_j$ ,

$$\begin{aligned}
d\ln P_j &= d \left( \ln \left( \prod_{s=1}^S (P_j^{sF} / \alpha_j^s)^{\alpha_j^s} \right) \right) = d \left( \sum_{s=1}^S \alpha_j^s \ln P_j^{sF} - \sum_{s=1}^S \alpha_j^s \ln \alpha_j^s \right) \\
&= \sum_{s=1}^S \alpha_j^s d\ln P_j^{sF} - \sum_{s=1}^S \alpha_j^s d\ln \alpha_j^s = \sum_{s=1}^S \alpha_j^s d\ln P_j^{sF}
\end{aligned} \tag{S13}$$

From  $P_j^{rF} = A^r \left[ \sum_{i=1}^J T_i^r (c_i^r \kappa_{ij}^{rF})^{-\theta^r} \right]^{-\frac{1}{\theta^r}}$  and  $\pi_{ij}^{sF} = \frac{T_i^s (c_i^s \kappa_{ij}^{sF})^{-\theta^s}}{\sum_{i=1}^J T_i^s (c_i^s \kappa_{ij}^{sF})^{-\theta^s}}$ , we can get:

$$\begin{aligned}
d\ln P_j^{SF} &= d\ln \left( A^s \left[ \sum_{i=1}^J T_i^s (c_i^s \kappa_{ij}^{SF})^{-\theta^s} \right]^{-\frac{1}{\theta^s}} \right) \\
&= d \left( \ln A^s + \left( -\frac{1}{\theta^s} \right) \ln \sum_{i=1}^J T_i^s (c_i^s \kappa_{ij}^{SF})^{-\theta^s} \right) \\
&= d\ln A^s + \left( -\frac{1}{\theta^s} \right) d\ln \left( \sum_{i=1}^J T_i^s (c_i^s \kappa_{ij}^{SF})^{-\theta^s} \right) \\
&= dA^s/A^s + \left( -\frac{1}{\theta^s} \right) d \left( \sum_{i=1}^J T_i^s (c_i^s \kappa_{ij}^{SF})^{-\theta^s} \right) / \sum_{i=1}^J T_i^s (c_i^s \kappa_{ij}^{SF})^{-\theta^s} \\
&= \left( -\frac{1}{\theta^s} \right) d \left( \sum_{i=1}^J T_i^s (c_i^s \kappa_{ij}^{SF})^{-\theta^s} \right) / \sum_{i=1}^J T_i^s (c_i^s \kappa_{ij}^{SF})^{-\theta^s} \\
&= \left( -\frac{1}{\theta^s} \right) \left( \sum_{i=1}^J (c_i^s \kappa_{ij}^{SF})^{-\theta^s} dT_i^s \right. \\
&\quad \left. + \sum_{i=1}^J T_i^s d(c_i^s \kappa_{ij}^{SF})^{-\theta^s} \right) / \sum_{i=1}^J T_i^s (c_i^s \kappa_{ij}^{SF})^{-\theta^s} \tag{S14} \\
&= \left( -\frac{1}{\theta^s} \right) \left( \sum_{i=1}^J T_i^s d(c_i^s \kappa_{ij}^{SF})^{-\theta^s} \right) / \sum_{i=1}^J T_i^s (c_i^s \kappa_{ij}^{SF})^{-\theta^s} \\
&= \left( -\frac{1}{\theta^s} \right) \left( \sum_{i=1}^J T_i^s (d\ln((c_i^s \kappa_{ij}^{SF})^{-\theta^s}) * ((c_i^s \kappa_{ij}^{SF})^{-\theta^s}) \right. \\
&\quad \left. / \sum_{i=1}^J T_i^s (c_i^s \kappa_{ij}^{SF})^{-\theta^s} \right) \\
&= \left( -\frac{1}{\theta^s} \right) \left( \sum_{i=1}^J (-\theta^s) d\ln(c_i^s \kappa_{ij}^{SF}) * (T_i^s (c_i^s \kappa_{ij}^{SF})^{-\theta^s}) \right. \\
&\quad \left. / \sum_{i=1}^J T_i^s (c_i^s \kappa_{ij}^{SF})^{-\theta^s} \right) \\
&= \sum_{i=1}^J d(\ln c_i^s + \ln \kappa_{ij}^{SF}) * (T_i^s (c_i^s \kappa_{ij}^{SF})^{-\theta^s}) / \sum_{i=1}^J T_i^s (c_i^s \kappa_{ij}^{SF})^{-\theta^s} \\
&= \sum_{i=1}^J d(\ln c_i^s + \ln \kappa_{ij}^{SF}) * \pi_{ij}^{SF} = \sum_{i=1}^J \pi_{ij}^{SF} (d\ln c_i^s + d\ln \tilde{\tau}_{ij}^{SF})
\end{aligned}$$

As  $d\ln P_j^{SF} = \sum_{i=1}^J \pi_{ij}^{SF} (d\ln c_i^s + d\ln \tilde{\tau}_{ij}^{SF})$ , we obtain  $d\ln P_j = \sum_{s=1}^S \alpha_j^s d\ln P_j^{SF} = \sum_{s=1}^S \alpha_j^s \sum_{i=1}^J \pi_{ij}^{SF} (d\ln c_i^s + d\ln \tilde{\tau}_{ij}^{SF})$ , the same with  $d\ln P_j^{SR} = \sum_{i=1}^J \pi_{ij}^{SR} (d\ln c_i^s + d\ln \tilde{\tau}_{ij}^{SR})$  and  $c_j^s = \gamma_j^s w_j^{\gamma_j^s} \prod_{r=1}^S P_j^{rs} \nu_j^{r_s}$ . we get:

$$\begin{aligned}
d\ln c_j^s &= d\ln \left( \gamma_j^s w_j^{\gamma_j^s} \prod_{r=1}^S P_j^{rs} \nu_j^{r_s} \right) = d \left( \ln \gamma_j^s + \ln w_j^{\gamma_j^s} + \sum_{r=1}^S \ln P_j^{rs} \nu_j^{r_s} \right) \\
&= d\ln \gamma_j^s + d \left( \gamma_j^s \ln w_j + \sum_{s=1}^S \gamma_j^{rs} \ln P_j^{rs} \right) \tag{S15} \\
&= \gamma_j^s d\ln w_j + \sum_{r=1}^S \gamma_j^{rs} d\ln P_j^{rs}
\end{aligned}$$

$$\begin{aligned}
d\ln W_j &= \frac{w_j L_j}{I_j} d\ln w_j + \frac{R_j}{I_j} d\ln R_j - d\ln P_j = \frac{w_j L_j}{I_j} d\ln w_j + \frac{dR_j}{I_j} - d\ln P_j \\
&= \frac{w_j L_j}{I_j} d\ln w_j + \frac{1}{I_j} \sum_{s=1}^S \sum_{i=1}^J \tau_{ij}^{sF} M_{ij}^{sF} d\ln M_{ij}^{sF} \\
&\quad + \frac{1}{I_j} \sum_{s=1}^S \alpha_j^s I_j \sum_{i=1}^J \pi_{ij}^{sF} d\ln \tilde{\tau}_{ij}^{sF} + \sum_{s=1}^S \sum_{i=1}^J \sum_{r=1}^S \tau_{ij}^{sr} M_{ij}^{sr} d\ln M_{ij}^{sr} \tag{S16} \\
&\quad + \sum_{s=1}^S \sum_{r=1}^S \sum_{i=1}^J M_{ij}^{sr} (1 + \tau_{ij}^{sr}) d\ln \tilde{\tau}_{ij}^{sr} \\
&\quad - \sum_{s=1}^S \alpha_j^s \sum_{i=1}^J \pi_{ij}^{sF} (d\ln c_i^s + d\ln \tilde{\tau}_{ij}^{sF})
\end{aligned}$$

First, we substitute  $\alpha_j^s I_j$ ,

$$\begin{aligned}
\ln W_j &= \frac{w_j L_j}{I_j} d \ln w_j + \frac{1}{I_j} \sum_{s=1}^S \sum_{i=1}^J \tau_{ij}^{sF} M_{ij}^{sF} d \ln M_{ij}^{sF} \\
&\quad + \frac{1}{I_j} \sum_{s=1}^S \alpha_j^s I_j \sum_{i=1}^J \pi_{ij}^{sF} d \ln \tilde{\tau}_{ij}^{sF} \\
&\quad + \frac{1}{I_j} \sum_{s=1}^S \sum_{i=1}^J \sum_{r=1}^S \tau_{ij}^{sr} M_{ij}^{sr} d \ln M_{ij}^{sr} \\
&\quad + \sum_{s=1}^S \sum_{r=1}^S \sum_{i=1}^J M_{ij}^{sr} (1 + \tau_{ij}^{sr}) d \ln \tilde{\tau}_{ij}^{sr} \\
&\quad - \frac{1}{I_j} \sum_{s=1}^S \alpha_j^s I_j \sum_{i=1}^J \pi_{ij}^{sF} (d \ln c_i^s + d \ln \tilde{\tau}_{ij}^{sF}) \\
&= \frac{w_j L_j}{I_j} d \ln w_j + \frac{1}{I_j} \sum_{s=1}^S \sum_{i=1}^J \tau_{ij}^{sF} M_{ij}^{sF} d \ln M_{ij}^{sF} \\
&\quad - \frac{1}{I_j} \sum_{s=1}^S \sum_{i=1}^J M_{ij}^{sF} (1 + \tau_{ij}^{sF}) d \ln c_i^s \\
&\quad + \frac{1}{I_j} \sum_{s=1}^S \sum_{i=1}^J \sum_{r=1}^S \tau_{ij}^{sr} M_{ij}^{sr} d \ln M_{ij}^{sr} \\
&\quad + \sum_{s=1}^S \sum_{r=1}^S \sum_{i=1}^J M_{ij}^{sr} (1 + \tau_{ij}^{sr}) d \ln \tilde{\tau}_{ij}^{sr}
\end{aligned} \tag{S17}$$

Second, we obtain export and import:

$$\begin{aligned}
d\ln W_j &= \frac{1}{I_j} \sum_{s=1}^S \sum_{i=1}^J \tau_{ij}^{sF} M_{ij}^{sF} (d\ln M_{ij}^{sF} - d\ln c_i^s) \\
&\quad + \frac{1}{I_j} \sum_{s=1}^S \sum_{i=1}^J (E_{ji}^{sF} d\ln c_j^s - M_{ij}^{sF} d\ln c_i^s) \\
&\quad - \frac{1}{I_j} \sum_{s=1}^S \sum_{i=1}^J E_{ji}^{sF} d\ln c_j^s + \frac{w_j L_j}{I_j} d\ln w_j \\
&\quad + \frac{1}{I_j} \sum_{s=1}^S \sum_{i=1}^J \sum_{r=1}^S \tau_{ij}^{sr} M_{ij}^{sr} d\ln M_{ij}^{sr} \\
&\quad + \sum_{s=1}^S \sum_{r=1}^S \sum_{i=1}^J M_{ij}^{sr} (1 + \tau_{ij}^{sr}) d\ln \tilde{\tau}_{ij}^{sr} \\
&\quad - \frac{1}{I_j} \sum_{s=1}^S \sum_{i=1}^J \sum_{r=1}^S M_{ij}^{sr} (1 + \tau_{ij}^{sr}) d\ln c_i^s \\
&\quad + \frac{1}{I_j} \sum_{s=1}^S \sum_{i=1}^J \sum_{r=1}^S M_{ij}^{sr} (1 + \tau_{ij}^{sr}) d\ln c_i^s \\
&\quad + \frac{1}{I_j} \sum_{s=1}^S \sum_{i=1}^J \sum_{r=1}^S E_{ji}^{sr} d\ln c_j^s - \frac{1}{I_j} \sum_{s=1}^S \sum_{i=1}^J \sum_{r=1}^S E_{ji}^{sr} d\ln c_j^s \\
&= \frac{1}{I_j} \sum_{s=1}^S \sum_{i=1}^J \tau_{ij}^{sF} M_{ij}^{sF} (d\ln M_{ij}^{sF} - d\ln c_i^s) \\
&\quad + \frac{1}{I_j} \sum_{s=1}^S \sum_{i=1}^J (E_{ji}^{sF} d\ln c_j^s - M_{ij}^{sF} d\ln c_i^s) \\
&\quad + \frac{1}{I_j} \sum_{s=1}^S \sum_{i=1}^J \sum_{r=1}^S \tau_{ij}^{sr} M_{ij}^{sr} (d\ln M_{ij}^{sr} - d\ln c_i^s) \\
&\quad + \frac{1}{I_j} \sum_{s=1}^S \sum_{i=1}^J \sum_{r=1}^S (E_{ji}^{sr} d\ln c_j^s - M_{ij}^{sr} d\ln c_i^s) + \frac{w_j L_j}{I_j} d\ln w_j \\
&\quad + \frac{1}{I_j} \sum_{s=1}^S \sum_{i=1}^J \sum_{r=1}^S M_{ij}^{sr} (1 + \tau_{ij}^{sr}) (d\ln \tilde{\tau}_{ij}^{sr} + d\ln c_i^s) \\
&\quad - \frac{1}{I_j} \sum_{s=1}^S \sum_{i=1}^J E_{ji}^{sF} d\ln c_j^s - \frac{1}{I_j} \sum_{s=1}^S \sum_{i=1}^J \sum_{r=1}^S E_{ji}^{sr} d\ln c_j^s
\end{aligned} \tag{S18}$$

Then we eliminate the residual term:

$$\begin{aligned}
\frac{w_j L_j}{I_j} d\ln w_j &+ \frac{1}{I_j} \sum_{s=1}^S \sum_{i=1}^J \sum_{r=1}^S M_{ij}^{sr} (1 + \tau_{ij}^{sr}) (d\ln \tilde{\tau}_{ij}^{sr} + d\ln c_i^s) \\
&- \frac{1}{I_j} \sum_{s=1}^S \sum_{i=1}^J E_{ji}^{sF} d\ln c_j^s - \frac{1}{I_j} \sum_{s=1}^S \sum_{i=1}^J \sum_{r=1}^S E_{ji}^{sr} d\ln c_j^s = 0
\end{aligned} \tag{S19}$$

$$\begin{aligned}
0 &= \frac{w_j L_j}{I_j} d \ln w_j + \frac{1}{I_j} \sum_{s=1}^S \sum_{r=1}^S \gamma_j^{sr} Y_j^r \sum_{i=1}^J \pi_{ij}^{sr} (d \ln \tilde{\tau}_{ij}^{sr} + d \ln c_i^s) \\
&\quad - \frac{1}{I_j} \sum_{s=1}^S \sum_{i=1}^J \left( \sum_{r=1}^S E_{ji}^{sr} + E_{ji}^{sF} \right) d \ln c_j^s \\
&= \frac{w_j L_j}{I_j} d \ln w_j + \frac{1}{I_j} \sum_{s=1}^S \sum_{r=1}^S \gamma_j^{sr} Y_j^r d \ln P_j^{sr} \\
&\quad - \frac{1}{I_j} \sum_{s=1}^S Y_j^s d \ln c_j^s \tag{S20} \\
&= \frac{w_j L_j}{I_j} d \ln w_j \\
&\quad - \frac{1}{I_j} \sum_{s=1}^S \gamma_j^s Y_j^s \left( \frac{1}{\gamma_j^s} d \ln c_j^s - \sum_{r=1}^S \frac{\gamma_j^{sr}}{\gamma_j^s} d \ln P_j^{rs} \right) \\
&= \frac{w_j L_j}{I_j} d \ln w_j - \frac{w_j L_j}{I_j} d \ln w_j = 0
\end{aligned}$$

Proof finished.
